# Supplementary material for: Enhancing the antimicrobial and antifungal activities of a coloring extract agent rich in betacyanins obtained from Gomphrena globosa L. flowers
Source: Royal Society of Chemistry journal article supplement (doi:10.1039/c8fo01829d), 2018-01-01
Supplement: c8fo01829d1.pdf [file c8fo01829d1.pdf]

MIC

MFC

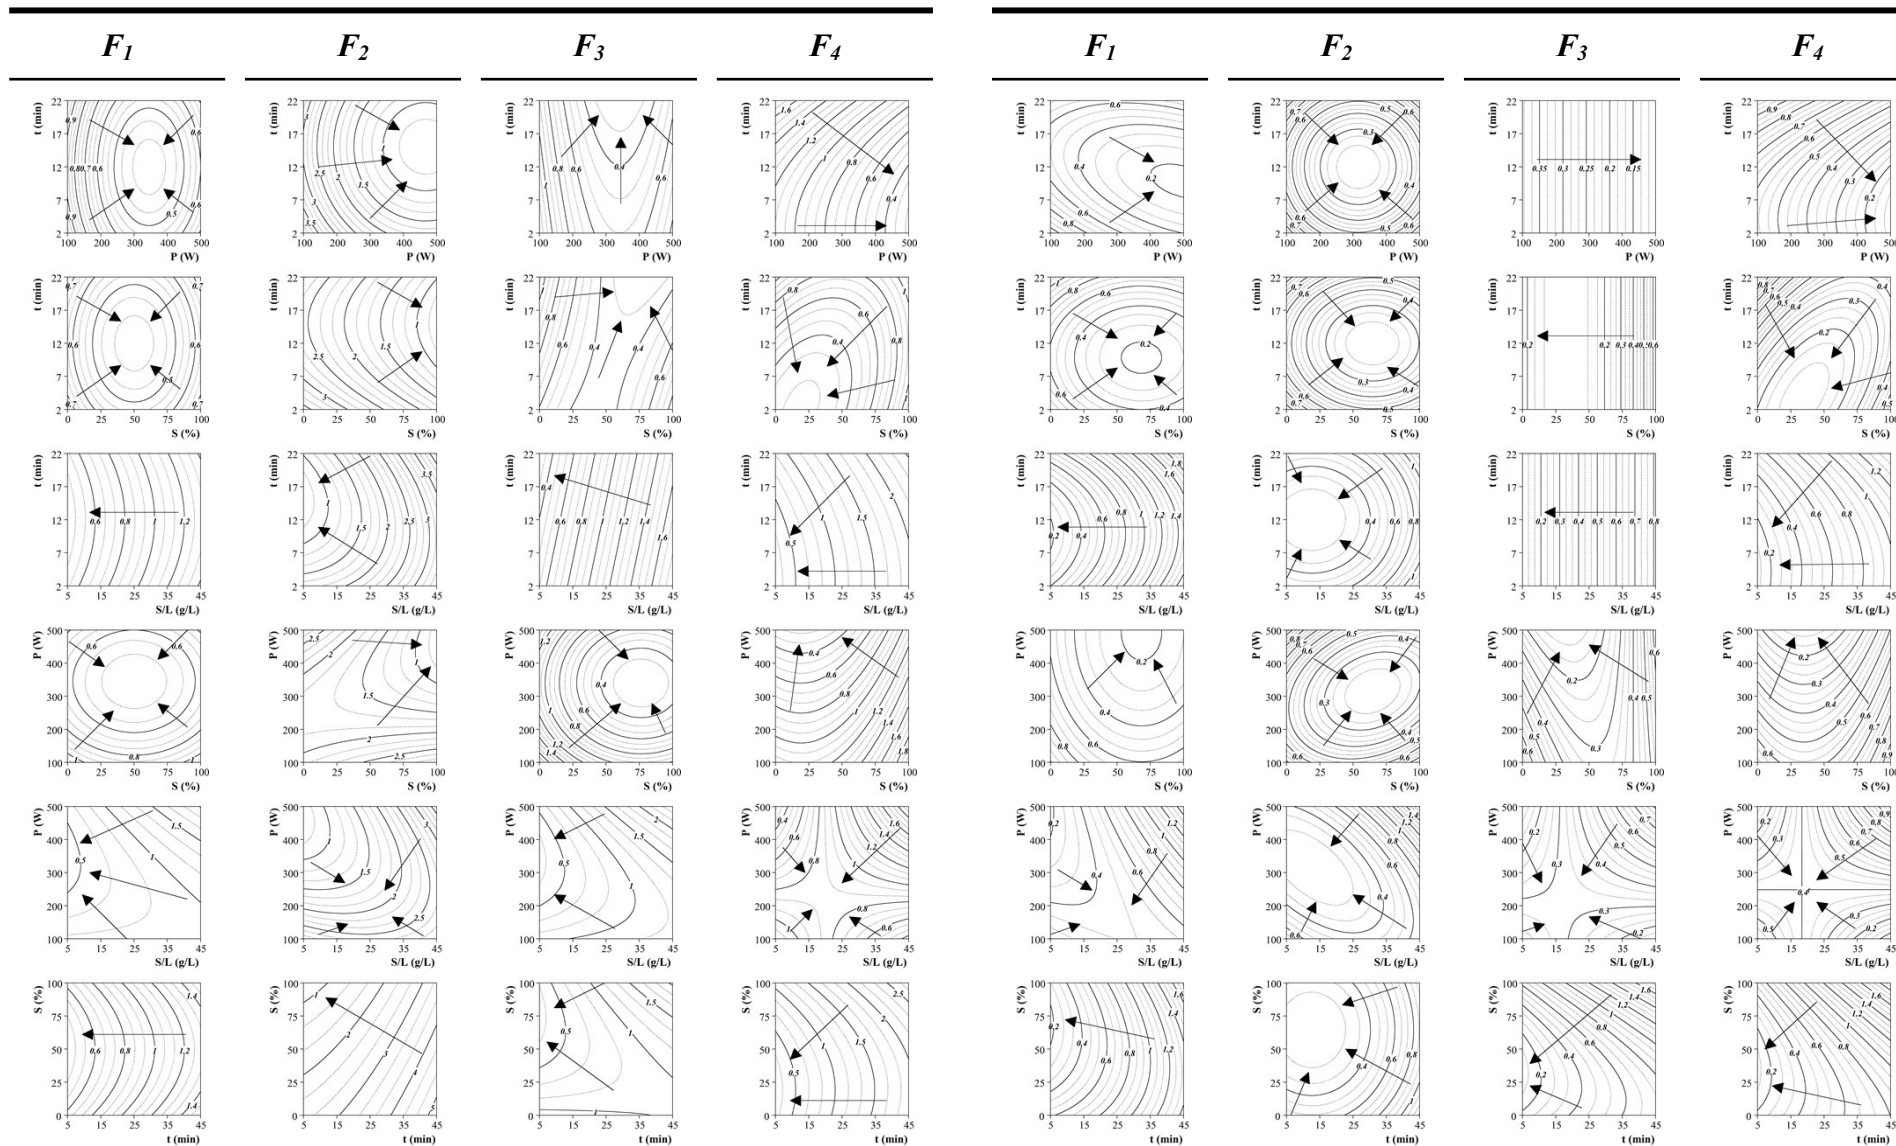

3 **Figure A1.** Contour plots for all the antifungal criteria (MIC and MFC) of all fungal strains used: *Aspergillus flavus* (F<sub>1</sub>), *Aspergillus niger* (F<sub>2</sub>), *Penicillium ochrochloron* (F<sub>3</sub>) and *Penicillium verrucosum* var. *cyclopium* (F<sub>4</sub>). For representation purposes, the variables excluded in each of the graphs were positioned at the optimal values of the others (Table 3). The obtained parametric fitting values are presented in Table 2.

**Table A1:** Coded and natural values of the optimization parameters used in the RSM analysis. The four independent variables  $X_1$  ( $t$ , time in min),  $X_2$  ( $P$ , power in W),  $X_3$  ( $S$ , ethanol proportion in %) and  $X_4$  ( $S/L$ , solid/liquid ratio in g/L) were combined in a five-level factorial design of 28 independent combinations and four replicates at the centre of the experimental domain.

| CODED VALUES | NATURAL VALUES |              |              |                  |
|--------------|----------------|--------------|--------------|------------------|
|              | $X_1: t$ (min) | $X_2: P$ (W) | $X_3: S$ (%) | $X_4: S/L$ (g/L) |
| -2           | 2              | 100          | 0            | 5                |
| -1           | 7              | 200          | 25           | 15               |
| 0            | 12             | 300          | 50           | 25               |
| +1           | 17             | 400          | 75           | 35               |
| +2           | 22             | 500          | 100          | 45               |
